# Supplementary material for: Aspartate β-Hydroxylase Serves as a Prognostic Biomarker for Neoadjuvant Chemotherapy in Gastric Cancer
Source: MDPI journal article supplement (doi:10.3390/ijms24065482), 2023-03-13
Supplement: s1 [file s1]

## Supplementary materials

**Figure S1**

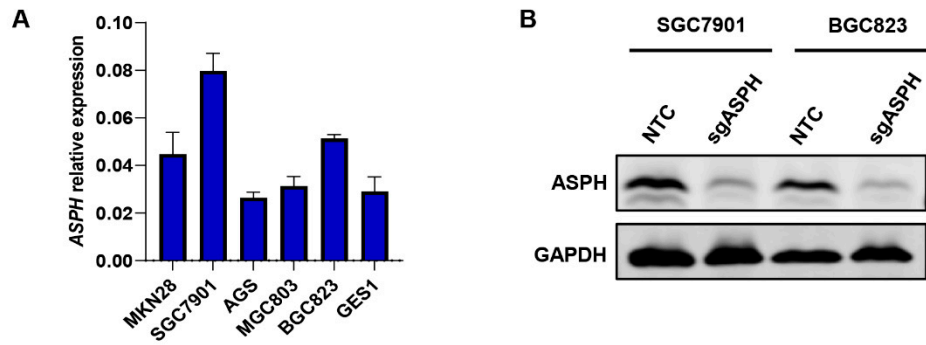

**Figure S1** Construction of ASPH-knockout cells. (A) Detection of endogenous ASPH in human gastric cancer cell lines by RT-qPCR analysis. (B) ASPH knockout cells were verified by western blot.

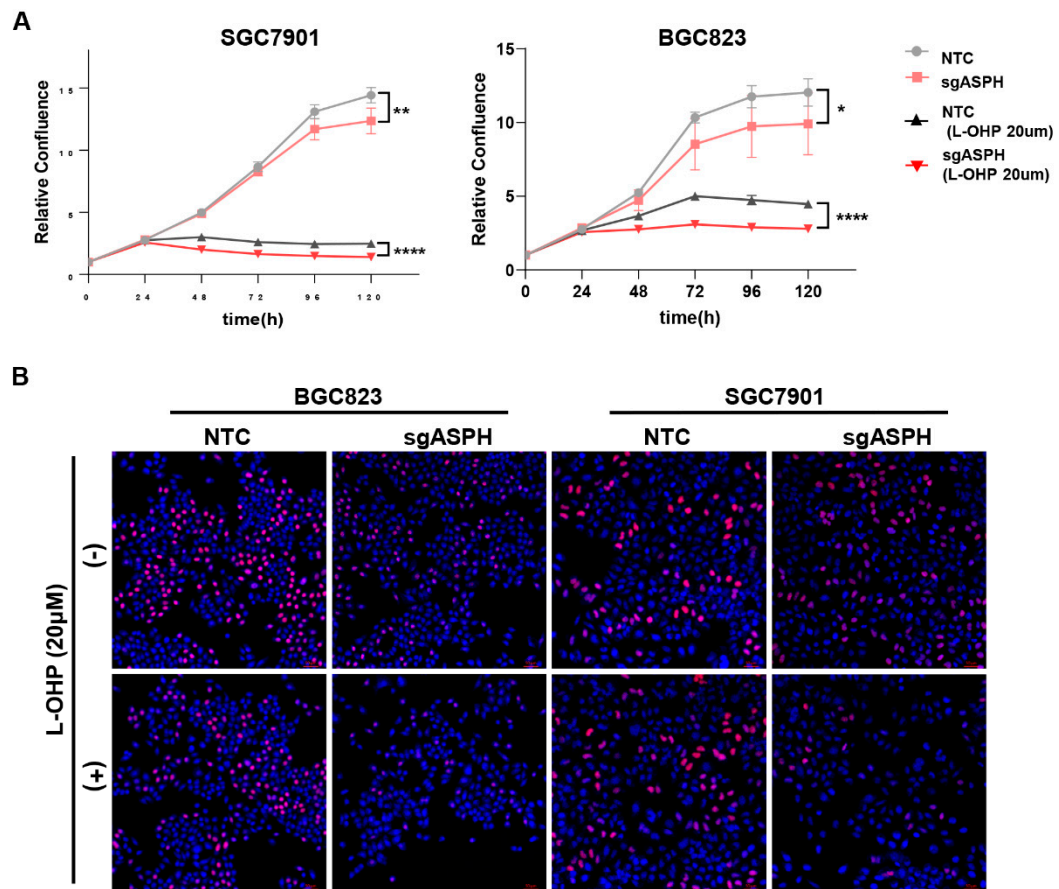

**Figure S2** ASPH knockout enhanced the inhibitory effect of chemotherapeutics on cell proliferation. (A) ASPH knockout cells obviously decreased cell proliferation ability disposed with or without L-OHP, detecting with IncuCyte ZOOM™ instrument. (B) EdU assay for proliferation of GC cells following L-OHP-induced apoptosis. \*  $p < 0.05$ , \*\*  $p < 0.01$ , \*\*\*\*  $p < 0.0001$ . Scale bar: 50μm.

**Table S1 Correlation of ASPH expression with clinicopathological features in 70 gastric cancer patients after neoadjuvant chemotherapy**

| Variables             |                 | ASPH expression |           | <i>P</i> value <sup>&amp;</sup> |
|-----------------------|-----------------|-----------------|-----------|---------------------------------|
|                       |                 | Negative        | Positive  |                                 |
| Age                   |                 |                 |           | 0.775                           |
|                       | ≤60             | 45              | 25        |                                 |
|                       | >60             | 25              | 13        |                                 |
| Sex                   |                 |                 |           | 0.492                           |
|                       | Male            | 53              | 30        |                                 |
|                       | Female          | 17              | 8         |                                 |
| Lymph node metastasis |                 |                 |           | 0.898                           |
|                       | No              | 17              | 9         |                                 |
|                       | N1+2+3          | 53              | 29        |                                 |
| Depth of invasion     |                 |                 |           |                                 |
|                       | T1+2            | 9               | 6         | 0.660                           |
|                       | T2+3            | 61              | 32        |                                 |
| Distant metastasis    |                 |                 |           | 0.846                           |
|                       | Mo              | 58              | 30        |                                 |
|                       | M1              | 8               | 5         |                                 |
|                       | Undetermined    | 4               | 3         |                                 |
| Differentiation       |                 |                 |           |                                 |
|                       | Poor            | 32              | 12 (37.5) | 0.014                           |
|                       | Moderate + Well | 34              | 23 (67.6) |                                 |
|                       | Undetermined    | 4               | 3         |                                 |
| Gross type            |                 |                 |           | 0.464                           |
|                       | Ulcerative type | 54              | 31        |                                 |
|                       | Others*         | 13              | 6         |                                 |
|                       | Undetermined    | 3               | 1         |                                 |
| Tumor size            |                 |                 |           | 0.758                           |
|                       | ≤5.0cm          | 35              | 20        |                                 |
|                       | >5.0cm          | 30              | 16        |                                 |
|                       | Undetermined    | 5               | 2         |                                 |
| Location              |                 |                 |           | 0.394                           |
|                       | Cardiac         | 16              | 10        |                                 |
|                       | Gastric         | 50              | 27        |                                 |
|                       | EGJ             | 4               | 1         |                                 |
| Lauren                |                 |                 |           | 0.114                           |
|                       | Diffuse         | 11              | 6         |                                 |
|                       | Intense         | 48              | 29        |                                 |
|                       | Mixed           | 6               | 1         |                                 |
|                       | Undetermined    | 5               | 2         |                                 |

|                     |    |    |            |       |
|---------------------|----|----|------------|-------|
| Histology           |    |    |            | 0.316 |
| Adenoma             | 62 | 35 | 27         |       |
| Others <sup>#</sup> | 7  | 2  | 5          |       |
| Undetermined        | 1  | 1  | 0          |       |
| TNM stage           |    |    |            | 0.163 |
| I+II                | 25 | 16 | 9 (36.0%)  |       |
| III+IV              | 41 | 19 | 22 (53.7%) |       |
| Undetermined        | 4  | 3  | 1          |       |

---

&: Chi-square test or Fisher's exact test

Others\*: protrude type, infiltrative type or mixed; Others<sup>#</sup>: signet-ring cell adenocarcinoma, mucinous adenocarcinoma.
